# Supplementary material for: Muscle-derived Myoglianin regulates Drosophila imaginal disc growth
Source: eLife journal article supplement (doi:10.7554/elife.51710), 2020-07-07

Figure 1 Supplement 2

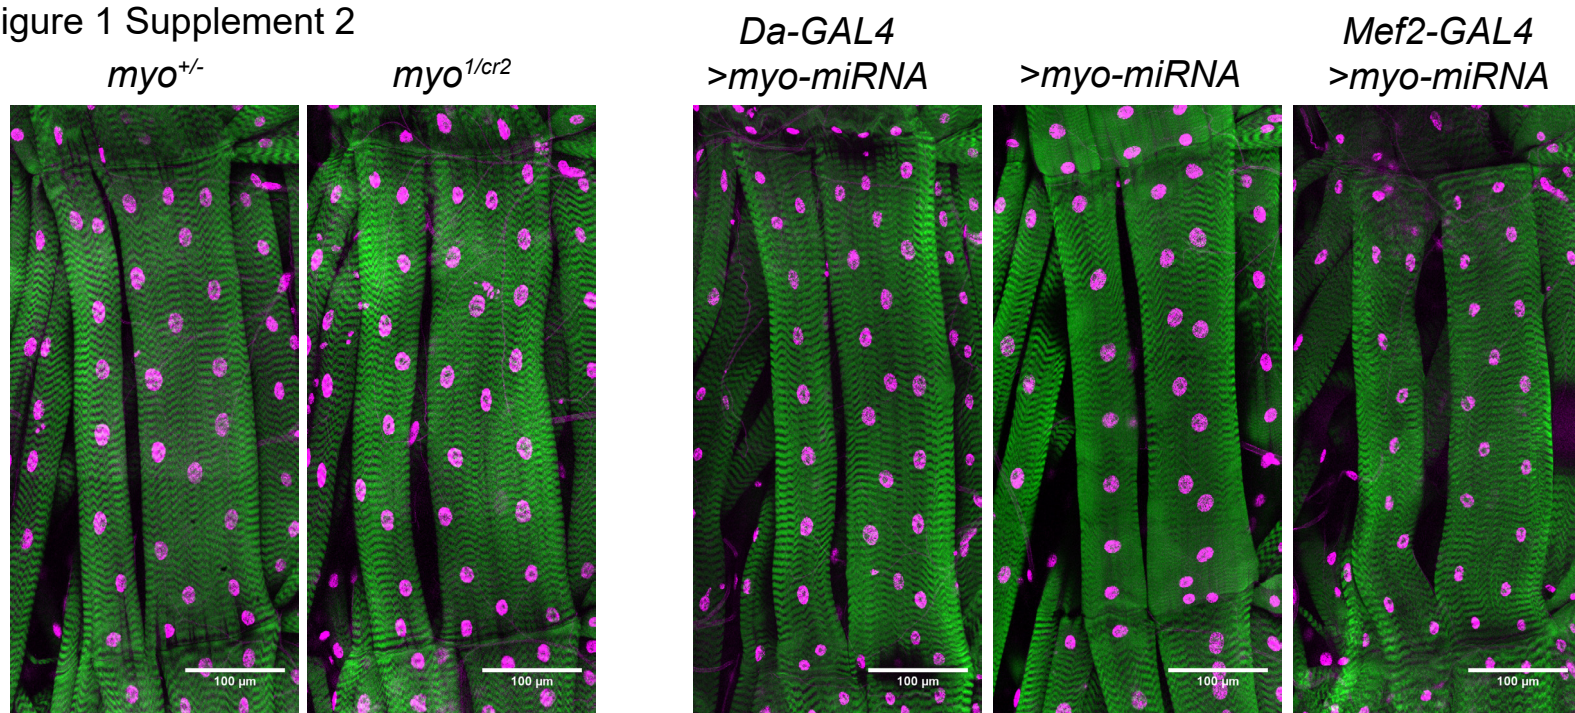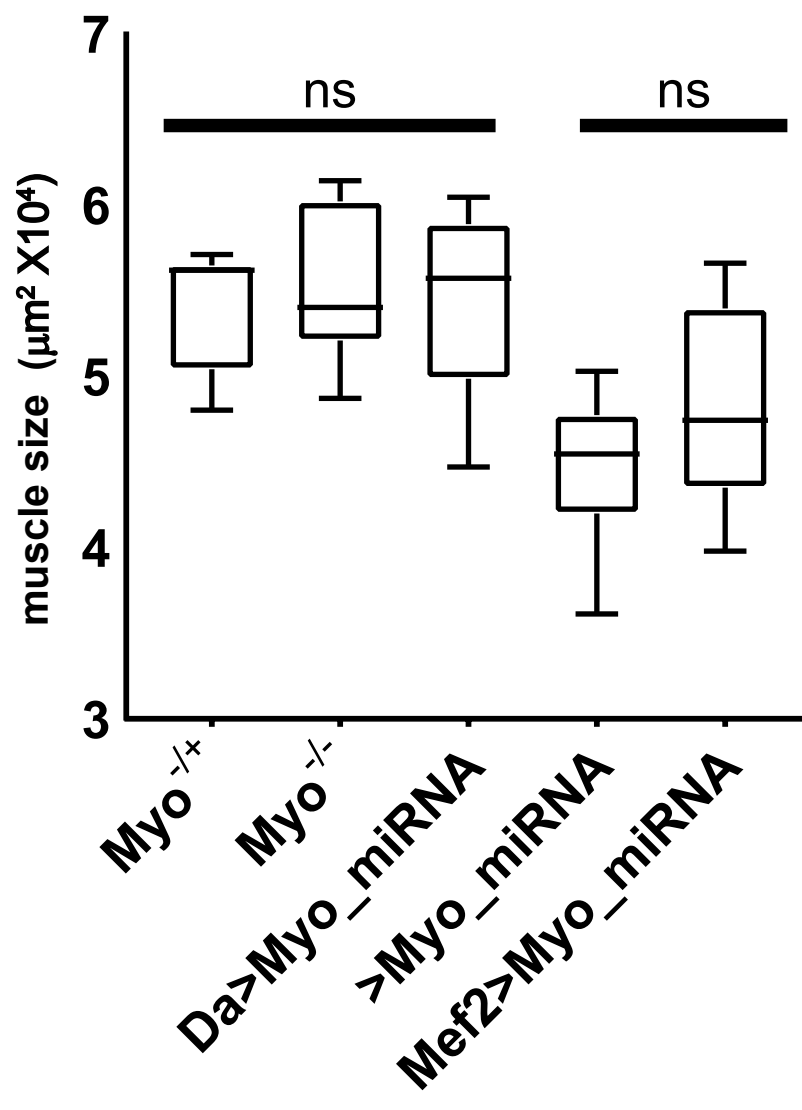

Supplement: supp [file elife_poa_e51710_Figure_1_figure_supplement_2.pdf › elife_poa_e51710_Figure_1_figure_supplement_2.pdf]
