# Supplementary material for: Muscle-derived Myoglianin regulates Drosophila imaginal disc growth
Source: eLife journal article supplement (doi:10.7554/elife.51710), 2020-07-07

Figure 3 Supplement 1

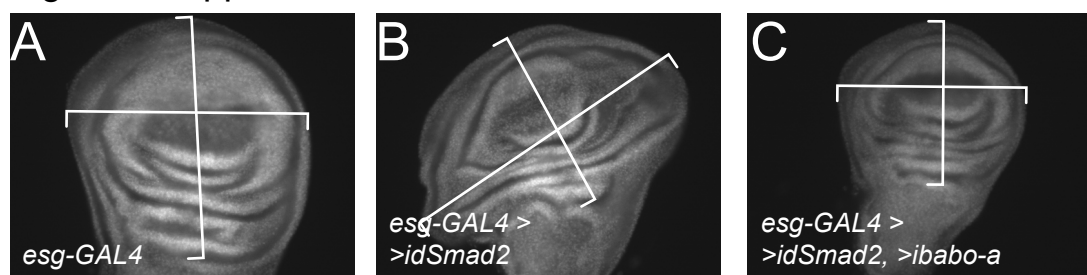

**D**

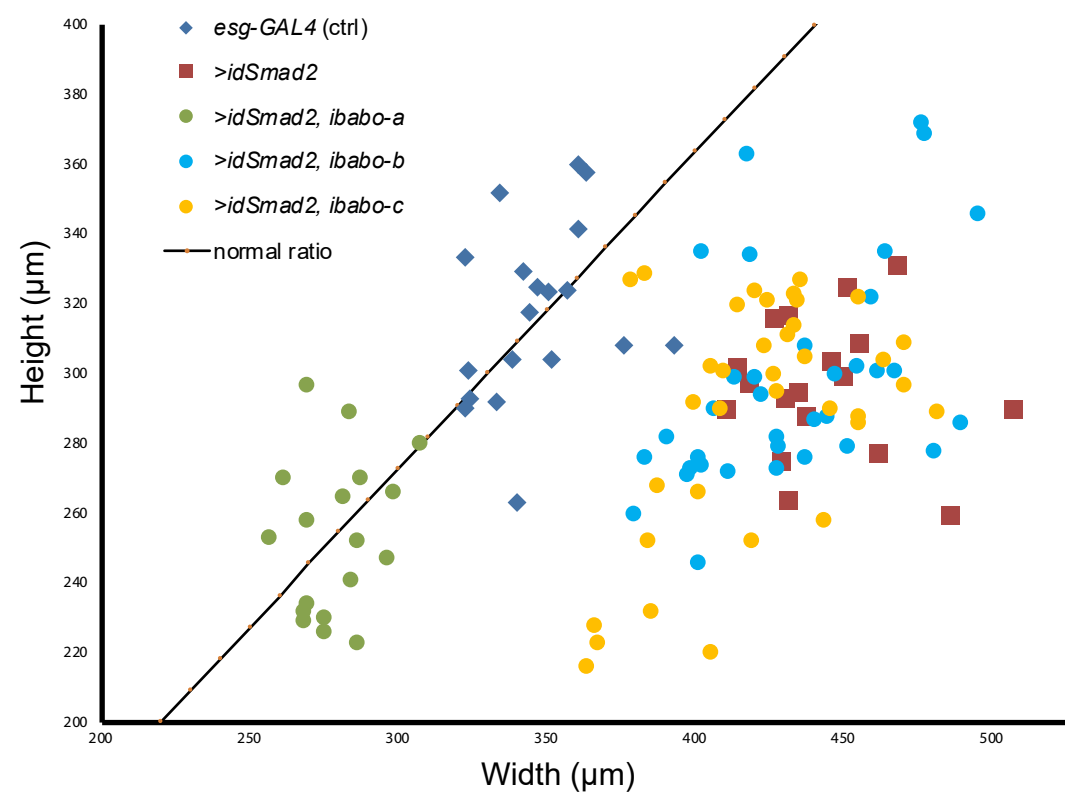

**E**

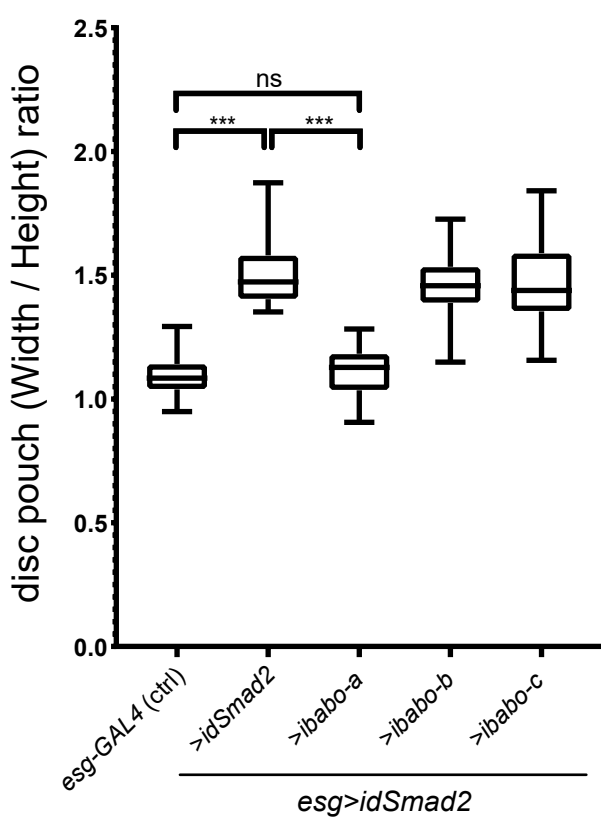

Supplement: supp [file elife_poa_e51710_Figure_3_figure_supplement_1.pdf › elife_poa_e51710_Figure_3_figure_supplement_1.pdf]
